# Supplementary material for: Second Version of a Mini-Survey to Evaluate Food Intake Quality (Mini-ECCA v.2): Reproducibility and Ability to Identify Dietary Patterns in University Students
Source: MDPI journal article supplement (doi:10.3390/nu12030809), 2020-03-19
Supplement: s1 [file s1]

### Mini Encuesta de Calidad del Consumo Alimentario Mini-ECCA

| No. | Preguntas                                                                                                                                        | Respuestas                                                                                                                                               |
|-----|--------------------------------------------------------------------------------------------------------------------------------------------------|----------------------------------------------------------------------------------------------------------------------------------------------------------|
| 1   | ¿Bebe, por lo menos, 1.5 litros de <b>agua natural</b> todos los días (de lunes a domingo)?                                                      | 1) Nunca <input type="checkbox"/> 2) Algunas veces <input type="checkbox"/> 3) Casi siempre <input type="checkbox"/> 4) Siempre <input type="checkbox"/> |
| 2   | ¿Consume, por lo menos, 200 g de <b>verduras cocidas o crudas</b> todos los días (de lunes a domingo)?                                           | 1) Nunca <input type="checkbox"/> 2) Algunas veces <input type="checkbox"/> 3) Casi siempre <input type="checkbox"/> 4) Siempre <input type="checkbox"/> |
| 3   | ¿Consume, al menos, 200 g de <b>pescado fresco o congelado (no enlatado)</b> A LA SEMANA?                                                        | 1) Nunca <input type="checkbox"/> 2) Algunas veces <input type="checkbox"/> 3) Casi siempre <input type="checkbox"/> 4) Siempre <input type="checkbox"/> |
| 4   | ¿Cuántas veces a la semana consume una o más latas (o vasos) de alguna <b>bebida azucarada</b> ?                                                 | 1) Nunca <input type="checkbox"/> 2) 1-3 veces <input type="checkbox"/> 3) 4-6 veces <input type="checkbox"/> 4) Diario <input type="checkbox"/>         |
| 5   | ¿Consume, por lo menos, 200 g de <b>frutas</b> todos los días (de lunes a domingo)?                                                              | 1) Nunca <input type="checkbox"/> 2) Algunas veces <input type="checkbox"/> 3) Casi siempre <input type="checkbox"/> 4) Siempre <input type="checkbox"/> |
| 6   | ¿Cuál es el <b>aceite o grasa</b> que utiliza con mayor frecuencia en la semana para preparar sus alimentos?                                     | 1) A <input type="checkbox"/> 2) B <input type="checkbox"/> 3) C <input type="checkbox"/> 4) No sé <input type="checkbox"/>                              |
| 7   | ¿Consume, por lo menos, 30 g de <b>oleaginosas</b> o media pieza de <b>aguacate</b> todos los días (de lunes a domingo)?                         | 1) Nunca <input type="checkbox"/> 2) Algunas veces <input type="checkbox"/> 3) Casi siempre <input type="checkbox"/> 4) Siempre <input type="checkbox"/> |
| 8   | ¿Consume <b>alimentos no preparados en casa</b> 3 o más veces por semana?                                                                        | 1) Nunca <input type="checkbox"/> 2) Algunas veces <input type="checkbox"/> 3) Casi siempre <input type="checkbox"/> 4) Siempre <input type="checkbox"/> |
| 9   | ¿Qué tipo de <b>carne</b> consume con mayor frecuencia en la semana?                                                                             | 1) A <input type="checkbox"/> 2) B <input type="checkbox"/> 3) C <input type="checkbox"/>                                                                |
| 10  | ¿Consume <b>alimentos procesados</b> (frituras, embutidos, platillos empaquetados listos para calentar y servir) 2 o más veces por semana?       | 1) Nunca <input type="checkbox"/> 2) Algunas veces <input type="checkbox"/> 3) Casi siempre <input type="checkbox"/> 4) Siempre <input type="checkbox"/> |
| 11  | ¿Consume <b>postres</b> (galletas, flanes, arroz con leche, pasteles) o <b>dulces</b> (caramelos, paletas, chocolates) 2 o más veces por semana? | 1) Nunca <input type="checkbox"/> 2) Algunas veces <input type="checkbox"/> 3) Casi siempre <input type="checkbox"/> 4) Siempre <input type="checkbox"/> |
| 12  | ¿Consume, por lo menos, 300 g de <b>leguminosas</b> a la semana?                                                                                 | 1) Nunca <input type="checkbox"/> 2) Algunas veces <input type="checkbox"/> 3) Casi siempre <input type="checkbox"/> 4) Siempre <input type="checkbox"/> |
| 13  | ¿Qué <b>cereales</b> consume con mayor frecuencia en la semana?                                                                                  | 1) A <input type="checkbox"/> 2) B <input type="checkbox"/> 3) C <input type="checkbox"/>                                                                |
| 14  | Si es hombre, ¿consume más de 2 <b>bebidas alcohólicas</b> al día?<br>Si es mujer, ¿consume más de 1 <b>bebida alcohólica</b> al día?            | 1) Nunca <input type="checkbox"/> 2) Algunas veces <input type="checkbox"/> 3) Casi siempre <input type="checkbox"/> 4) Siempre <input type="checkbox"/> |

**Autores:** Gabriela Macedo Ojeda, María Fernanda Bernal Orozco, Barbara Vizmanos Lamotte, Martha Betzaida Altamirano Martínez, Yolanda Fabiola Márquez Sandoval, Montserrat González Gómez, Nayeli Badillo Camacho, Jaime Fernando Orozco Gutiérrez, Ruth Jackelyne Prado Arriaga, Patricia Belen Salmeron Curiel.
